# Methionine increases yolk production to offset the negative effect of caloric restriction on reproduction without affecting longevity in *C. elegans*

Gaojian Zhou<sup>1</sup>, Chuan Huang<sup>3</sup>, Liu Xing<sup>3</sup>, Le Li<sup>4</sup>, Yan Jiang<sup>2</sup>, Yuehua Wei<sup>5</sup>

<sup>1</sup>Basic Medicine College, Central South University, Changsha, Hunan, People's Republic of China

<sup>2</sup>Hunan Gaocell Medical Technology Co. Ltd., Changsha, Hunan, People's Republic of China

<sup>3</sup>Reproductive and Genetic Hospital of CITIC-Xiangya, Changsha, Hunan, People's Republic of China

<sup>4</sup>ProMab Biotechnologies, Richmond, CA 94806, USA

<sup>5</sup>Shanghai Ninth People's Hospital, Shanghai Jiao Tong University, School of Medicine, Shanghai, People's Republic of China

**Correspondence to:** Yan Jiang, Yuehua Wei; **email:** [970448106@qq.com](mailto:970448106@qq.com), [wei\\_yuehua@hotmail.com](mailto:wei_yuehua@hotmail.com)

**Keywords:** methionine, reproduction, calorie restriction (CR), side effect, vitellogenin

**Received:** October 24, 2019

**Accepted:** January 12, 2020

**Published:** February 6, 2020

**Copyright:** Zhou et al. This is an open-access article distributed under the terms of the Creative Commons Attribution License (CC BY 3.0), which permits unrestricted use, distribution, and reproduction in any medium, provided the original author and source are credited.

## ABSTRACT

Caloric restriction (CR) or Dietary restriction (DR) is known to improve health and in many cases increases lifespan. However, its negative effect on reproduction has not been fully studied. Practicing CR/DR without adequate knowledge on its side effect may risk complications such as infertility, birth defect, or malnutrition. In this study, by using several CR strategies in *C. elegans*, we examine key functions of reproduction including embryonic development and larvae growth. We find that CR significantly decreases the survival of embryos and slows the growth of the offspring. We further determine that defect in oocyte but not sperm is responsible for the compromised reproduction under CR. Interestingly, adding methionine to the medium reverses the reproduction defects, but does not affect the long lifespan resulted from CR. The beneficial effect of methionine on reproduction requires the yolk protein vitellogenin. CR down-regulates vitellogenin expression, which can be reversed by supplementing methionine in the food. Lacking the yolk protein transport due to *rme-2* mutation blocks methionine's beneficial effects. Our study has revealed a novel, methionine-mediated genetic pathway linking nutrient sensing to reproduction and suggested methionine as a potential food supplement to mitigate the side effect of CR.

## INTRODUCTION

Nutrition status during pregnancy can modulate gene transcription of embryos, therefore causing physiological and structural change in the offspring [1]. Dysregulation of maternal nutrition intake during pregnancy might predispose the individual to metabolic, endocrine, and cardiovascular diseases in postnatal life [2]. However, little information is available regarding how the information are transmitted from parents to affect physiological and pathological changes in the next generation.

Caloric restriction (CR) or dietary restriction (DR) is a method to decrease food intake without causing malnutrition. Increased lifespan has been observed in many types of calorie-restricted animals, including *C. elegans*, *Drosophila*, mice and rhesus monkeys, suggesting a common and highly conserved mechanism [3]. Importantly, restricting calorie uptake not only prolongs lifespan, but also significantly improves various health parameters in higher animals [4–7]. In human, CR can significantly improve health of patients with diabetes, cardiovascular disease and some cancers [8–10]. CR can also protect against neurodegenerative disease and

improve memory in elderly humans [11, 12]. However, negative effect has also been observed. For example, CR can cause muscle loss [13], bone loss [14] and compromised immune response [15]. In large population studies of the Dutch famine during World War II, long-term undernutrition resulted in reduced birth weight, head circumference and mental and physical health in early adult life [16–18].

Methionine restriction (MetR), similar to CR, extends lifespan in yeast [19–21], flies [22, 23], worms [24] and rodents [25–27]. The mechanism remains not fully defined. However, studies have suggested that MetR could achieve the beneficial effect through the growth hormone/insulin-like growth factor 1 (GH/IGF1) pathway [25], the mitochondrial respiration pathway [28] and/or the transsulfuration pathway [29], among many others [30]. CR/DR effect in *Drosophila* has been attributed to some essential amino acid including methionine [31]. Methionine is especially important as it can specifically improve egg production in chicken [32] and milk production of dairy cows [33], suggesting a specific role in nutrient metabolism and reproduction.

Considering the direct effect of maternal nutrition on reproduction health, it is surprising that little studies have been shown to address the effect of CR on reproduction. Although lacking evidence of lifespan extension in human, CR/DR has become very popular and more and more people, especially young generations are practicing CR/DR. Therefore, accurate evaluation of CR/DR's risk is needed to avoid potential side effects that might negatively impact reproductive health of relevant individuals.

In this study, we used *C. elegans* as the animal model to study the effect of CR/DR on reproduction system such as egg, sperm and embryonic development. We find that CR shows deleterious effect on reproduction including increased mortality rate of embryo and delayed growth of offspring. We further dissect the underlying mechanisms and find that the negative effect on reproduction is attributed to the yolk protein vitellogenin in the eggs. Male reproduction does not appear to be impaired by CR/DR. The essential amino acid methionine can mitigate the negative effect of CR but leaving the extended lifespan unchanged. Our study provides important knowledge to better understand the side effect of CR on reproduction.

## RESULTS

### Methionine mitigates the reproduction defect caused by CR in *C. elegans*

Considering the important and specific roles of methionine in nutrient metabolisms, we were interested to know if methionine could mitigate the reproduction defect caused

by calorie restriction. Calorie restriction is known to reduce offspring numbers in many organisms [34], a side effect that could be conserved in mammals. To understand the roles of methionine in growth and reproduction under CR/DR condition, we used CR/DR strategies established early in *C. elegans* [35]. To calorie restrict the animals, we diluted bacteria and cultured worms from L1 larvae stage on nematode growth (NG) medium plates supplemented with various concentrations of methionine (0, 1, 2, 5 and 10 mM). We found that CR/DR robustly reduced total egg production, which however was rescued by supplementing methionine at 2, 5, and 10 mM, with 5 mM achieving the best rescue (Figure 1A). To test if the rescue effect was specific to methionine, we also added cysteine, a sulfur-containing amino acid similar to methionine, and another 2 essential amino acids, threonine and leucine. However, at concentrations ranging from 1 to 10 mM, no rescue effect was observed for cysteine, threonine and leucine (Supplementary Figure 1). We also tested the cysteine precursor n-acetyl-cysteines (NAC), which has high water solubility. As shown in Supplemental Information Supplementary Figure 2, NAC slightly improved the egg production in both control and CR/DR groups in a dose-dependent manner, suggesting that NAC has no specific function in the CR/DR pathway. Second, we examined the effect of methionine on egg hatching. CR robustly decreased the egg hatching rate. Interestingly, such detrimental effect of CR was significantly mitigated by 5 mM methionine (Figure 1B). To confirm the observations, we also conducted similar experiments by using eat-2(ad1116) mutant. The eat-2 mutant has a reduced pharyngeal pumping rate, hence reduced food uptake, which makes it a widely-used CR/DR model [36]. Consistently, defect in egg production and hatching in eat-2 mutant were significantly improved by methionine (Figure 1C and 1D).

We also asked if progenies from the calorie-restricted animals could be defect in development and whether methionine can rescue such defect. To test this, we calorie restricted the parental animals from L1 stage as before and collected eggs within 3 hours to obtain age-synchronized progenies. Grown on normal NG medium with Ad libido OP-50 bacteria food, the progenies of calorie-restricted parents appeared to be smaller than controls (Figure 2A, 2B). Interestingly, adding methionine almost completely reversed the small body size. The slow growth phenotype only occurred transiently, as it disappeared in the second (F2) generation (Figure 2C).

### Methionine does not shorten the CR-induced long lifespan in *C. elegans*

Methionine has been implicated in lifespan regulation in many organisms and human cells [19]. It has therefore

been proposed that methionine or its metabolite serve as a switch to control lifespan during CR. We asked if methionine supplemented in NG medium would cancel lifespan extension induced by CR. Fed diluted bacteria

as the CR regimen, *C. elegans* exhibited extended lifespan as expected. Adding methionine at the optimal concentration that reversed reproduction defect did not obviously change the lifespan of either control animals or

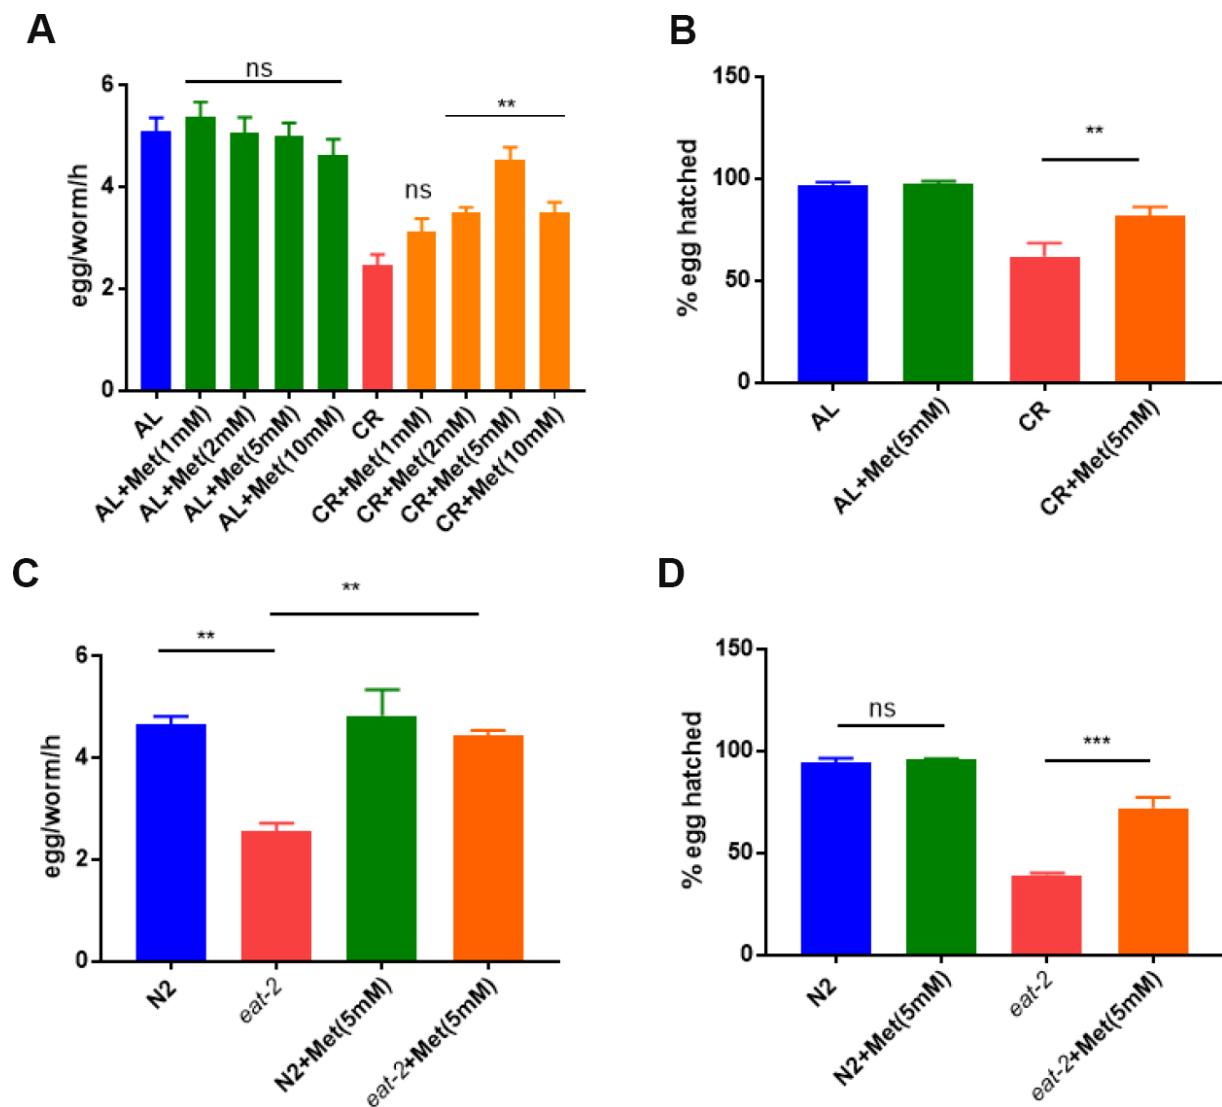

**Figure 1. Methionine supplementation prevents calorie restriction (CR) to reduce egg production and survival. (A)** Egg production was reduced by CR and rescued by methionine. Ad libido (AL) and CR conditions were achieved by plating  $1 \times 10^{11}$ /mL and  $1 \times 10^8$ /mL OP-50 bacteria, respectively, on solid nematode growth (NG) medium containing carbenicillin and kanamycin. Worms were raised on NG medium supplemented with indicated concentrations of methionine (Met) from hatching to day-1 adulthood. Worms ( $n > 25$ ) were allowed to lay eggs for 3 hours and egg production were evaluated in per worm per hour (egg/worm/h). Data were collected from 3 independent experiments. P values were obtained by t-test: ns, not significant; \*\*,  $P < 0.001$ . **(B)** Embryos survival rate was reduced by CR and rescued by methionine. Worms were raised on AL and CR conditions to day-1 adulthood and eggs were collected within 3 hours to obtain synchronized embryos. Hatching rate was determined by examining the number of dead eggs and larvae at L2/L3 stage. Data were collected from 3 independent experiments with each experiment examining  $n > 100$  animals. P values were obtained by t-test: \*\*,  $P < 0.001$ . **(C)** Egg production was reduced in CR model (*eat-2* mutant) and rescued by methionine. N2 wild-type and *eat-2(ad1116)* worms were raised on NG medium supplemented with and without 5mM methionine (Met) today-1 adulthood. Egg production was evaluated as in A. Data were collected from 3 independent experiments. P values were obtained by t-test: \*\*,  $P < 0.001$ . **(D)** Embryos survival rate was reduced in CR model (*eat-2* mutant) and rescued by methionine. N2 wild-type and *eat-2(ad1116)* worms were raised on NG medium supplemented with and without 5mM methionine (Met) today-1 adulthood. Embryo survival rate was determined as in C. Data were collected from 3 independent experiments. P values were obtained by t-test: ns, not significant; \*\*,  $P < 0.001$ .

animals under CR condition (Figure 3A). Similarly, in *eat-2(ad1116)* mutant, the long lifespan was not obviously affected by 5mM methionine supplemented in NG medium (Figure 3B). Methionine had taken effect in our experiments as we noticed the same robust increase in the offspring body size as shown in Figure 2A. We concluded that methionine did not shorten the long lifespan of calorie-restricted animals. Our data also suggest that, at certain situations, CR extension of lifespan can be decoupled from its effect on reproduction.

### CR-induced reproduction defect in *C. elegans* is due to compromised oocyte but not sperm

*C. elegans* are majorly hermaphrodites and can reproduce with their own oocyte and sperm. Males are

present at very low frequency and may increase under stress conditions, including calorie restriction [37]. We were interested to know if the defect in reproduction caused by CR was originated from oocyte, sperm or both. To this end, we calorie-restricted either hermaphrodites or males and cross them to *ad libido* (AL) males or hermaphrodite (Figure 4A). If CR-induced reproduction defect was due to sperm but not oocyte, we would expect to see (1) rescue of egg production from CR hermaphrodites crossed to AL males and (2) crossing CR males to AL hermaphrodites would reduce egg production. To the contrast, if due to oocyte but not sperm, (1) there would be no rescue of egg production by crossing CR hermaphrodites to AL males and (2) crossing CR males to AL hermaphrodites would not reduce egg production. If it was due to both oocyte and sperm, (1) either crossing CR

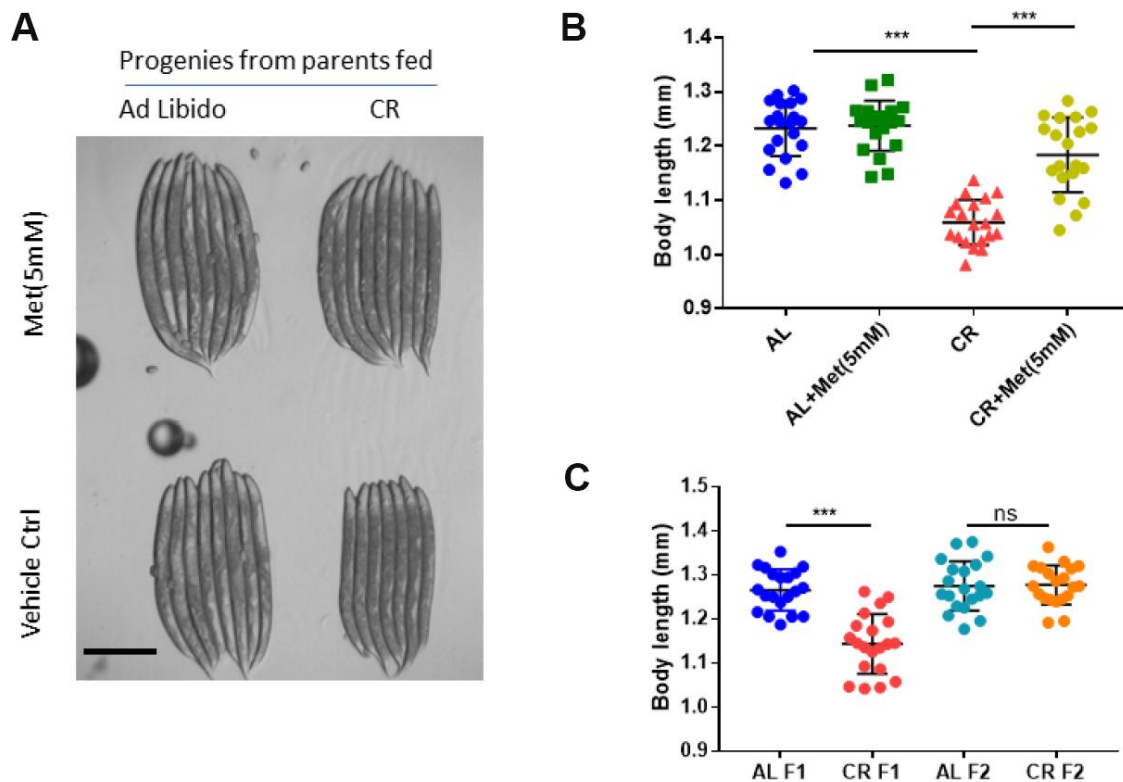

**Figure 2. Methionine supplementation reverses the negative effect of calorie restriction (CR) on small body size of the progenies.** (A) Representative image of progenies from worms raised under Ad libido (AL) and CR conditions. AL and CR were achieved by plating  $1 \times 10^{11}$ /mL and  $1 \times 10^8$ /mL OP-50 bacteria, respectively, on solid nematode growth (NG) medium containing carbenicillin and kanamycin. Parental worms were raised on NG medium supplemented with indicated concentration of methionine (Met) from hatching to day-1 adulthood. Worms were allowed to lay eggs for 2 hours to obtain synchronized embryos. Progenies were raised on NG medium with growing OP-50 to day-1 adulthood and imaged with Leica microscope. (B) CR reduces body size of progenies, which can be mitigated by methionine. Parental worms raised under Ad libido (AL) and CR conditions were treated with 5mM methionine (Met) as in A and progenies were collected and imaged as in A. Data were collected from 2 independent experiments. Body length of 20 worms were measured by using ImageJ and plotted by using Graphpad Prism software. P values were obtained by t-test: \*\*\*,  $P < 0.0001$ . (C) The negative effect of CR on body size of progenies is transient. The first (F1) and second (F2) generations of progenies from parental worms raised under Ad libido (AL) and CR conditions were raised and imaged as in A and measured as in B. Data were collected from 2 independent experiments. P values were obtained by t-test: ns, not significant; \*\*\*,  $P < 0.0001$ .

hermaphrodites to normal males or crossing CR males to normal hermaphrodites would not rescue egg production and (2) crossing CR hermaphrodite to CR males should aggravate the defect in egg production. Our results showed that the defect in reproduction under CR condition was mostly originated from defect in oocyte but not sperm (Figure 4B and 4C).

### Methionine elevates the yolk proteins to mitigate CR's negative effect on reproduction in *C. elegans*

We explored the molecular pathways that mediate CR's negative effect on reproductive ability. Since CR only affected oocyte fertility, we focused on gene expression and metabolites specific to oocyte. One of the most obvious differences between oocyte and sperm is the yolk protein, which is essential for oocyte maturation and embryonic development but is not known to be expressed in sperm of *C. elegans*. We tested if yolk protein production was affected by CR (*eat-2* mutant) and whether it could be rescued by methionine. Vitellogenin are major yolk proteins, which are expressed from 6 *vit* genes in *C. elegans* [38]. By using a transgenic strain expressing a tdimer2-tagged vitellogenin (YP170::tdimer2) as an indicator for yolk proteins [39], we found that CR animals showed significant reduction in yolk protein expression, which was rescued by supplementing methionine in the food (Figure 5A and 5B). Methionine did not increase the YP170::tdimer2 in wild-type animals, suggesting a specific effect of methionine on yolk proteins (Figure 5B).

Next, we asked if yolk proteins were required for the methionine to rescue the reproductive defect of CR animals. Yolk proteins are made in the intestine and transported into the oocyte to support embryonic growth and survival. Yolk proteins uptake by oocytes requires endocytosis mediated through RME-2 [40]. We found that RNAi knockdown of *rme-2* expression in the *eat-2* CR model animals prevented methionine from improving egg production (Figure 5C) and hatching rate (Figure 5D). These results suggest that increased yolk production and transport into the oocyte is required for methionine to improve the impaired reproduction of CR animals.

## DISCUSSION

Our study in *C. elegans* shows that CR/DR could cause detrimental effect on the reproductive system. CR/DR significantly reduces the number of eggs and viable embryos. Importantly, CR/DR also negatively affects the development and growth of the offspring. The negative effect of CR/DR on reproduction and its transgenerational property suggest important message to those practicing CR/DR for health benefits. We trace the origin of the side effect to be eggs rather than sperm. The dimorphism of sex response to CR is consistent with reports showing that CR does not extend lifespan of males [41] and glucose-rich medium shortens lifespan of hermaphrodites but not males [42]. Interestingly, methionine supplementation can reverse all the defects observed in the reproductive systems in *C. elegans*.

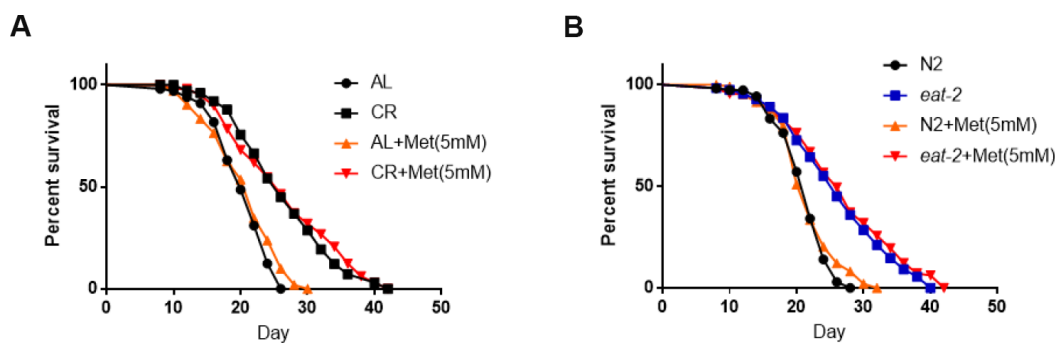

**Figure 3. Methionine does not shorten the long lifespan achieved by calorie restriction. (A)** The long lifespan from feeding diluted bacteria is not significantly affected by 5mM methionine. Ad libido (AL) and CR conditions were achieved by plating  $1 \times 10^{11}$ /mL and  $1 \times 10^8$ /mL OP-50 bacteria, respectively, on solid nematode growth (NG) medium containing carbenicillin and kanamycin. Worms were raised on NG medium supplemented with or without 5mM methionine (Met) throughout life with frequent transfer to new plates to avoid contamination by progenies. Number of deaths and lives were recorded every other day. Data from 3 independent experiment were pooled and plotted by using Graphpad Prism software. P values were obtained by log-rank test: CR (met) vs. CR, not significant; CR(met) vs. AL,  $P < 0.0001$ . See Supplementary Table 1 in Supplemental Information (SI) for more information. **(B)** The long lifespan from CR model (*eat-2* mutant) is not significantly affected by 5mM methionine. N2 wild-type and *eat-2(ad1116)* worms were raised on normal NG medium with sufficient OP-50 bacterial food and also supplemented with and without 5mM methionine (Met). Number of deaths and lives were recorded every other day and with frequent transfer to new plates to avoid contamination by progenies. Data from 3 independent experiment were pooled and plotted by using Graphpad Prism software. P values were obtained by log-rank test: *eat-2*(met) vs. *eat-2*, not significant; *eat-2*(met) vs. N2,  $P < 0.0001$ . See Supplementary Table 2 in Supplemental Information (SI) for more information.

Despite its rescuing effect, methionine does not cancel the extended lifespan achieved by CR in *C. elegans*, suggesting that the benefits of CR on lifespan extension can be decoupled from its negative effects on reproduction and growth. These results are consistent with previous studies in *Drosophila* [31, 43], where fecundity and survival under certain CR conditions can be unlinked, suggesting that methionine could be a potential food supplement for humans practicing CR. It will be also interesting to know if in higher animals methionine could have beneficial effect on CR-related diseases such as immunity defect [44, 45] and osteoporosis [46].

Interestingly, we found that the side effect of CR could be transgenerational. Offspring of calorie-restricted animals not only are smaller in size than controls, but also develop slower. These results are consistent with some early studies in human showing the negative effect of long-term undernutrition birth weight, head circumference and mental and physical health in early adult [16–18]. The transgenerational effect of calorie restriction has also been reported for lifespan extension, where evidence points to epigenetic alternations in early embryos of calorie-restricted parents [47, 48]. The transgenerational effects become indiscernible in later generations in our study (Figure 2) and previous reports

[47, 48], supporting the involvement of epigenetic alteration rather than genetic selection. Considering the importance of maternal nutrition on embryos, further investigations into the transgenerational side effect of CR, especially on higher animals, are urgently needed.

How does methionine rescue CR-induced reproductive defect? In addition to functioning as the first amino acid in polypeptides, methionine also regulates DNA methylation and antioxidant balance [49]. Modulation of genes in the methionine metabolisms can protect embryonic stem cells from oxidative stress [50], however, a direct role of antioxidant effect on embryonic development has not been reported. Interestingly, we find that CR can reduce the expression of egg yolk protein YP170 in the intestine, which is rescued by methionine supplementation (Figure 5). Importantly, such rescue is blocked by a mutation [40] that blocking egg yolk protein transport from intestine to the oocyte (Figure 5), suggesting that methionine's beneficial effect on reproduction could be at least partly attributed to enhanced egg yolk production. As yolk protein is essential for oocyte maturation, CR might selectively reduce egg yolk proteins in the intestine, which in turn cause all the phenotypes of reproductive impairment, including egg laying, hatching rate and

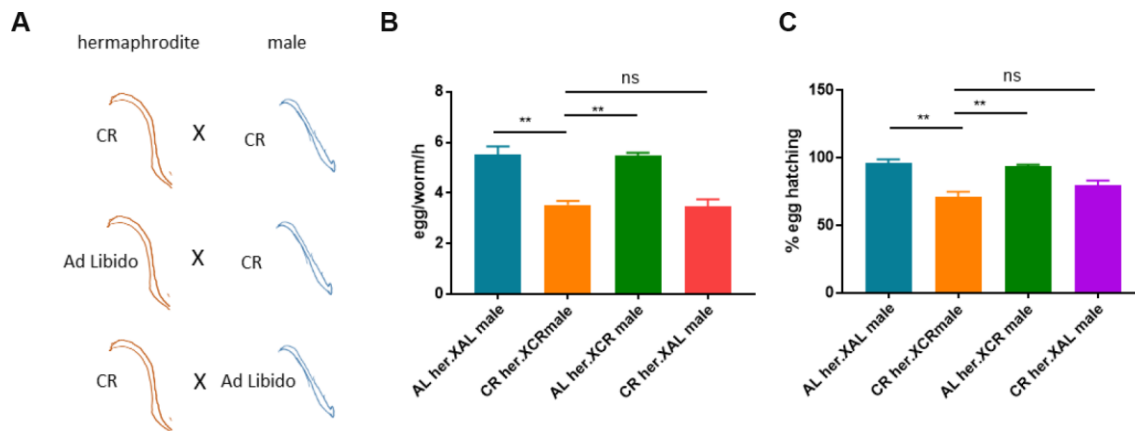

**Figure 4. Calorie restriction-induced reproduction defect is attributed to oocyte but not sperm.** (A) Schematic diagram showing the experimental design to study the origins of reproductive defect caused by CR. Shown are different crosses between CR hermaphrodites and males. CR hermaphrodites crossed to CR males is expected to still have reproductive defect. If normal hermaphrodites crossed to CR males still have reproductive defect, then the defect was traced to sperm. If CR hermaphrodites crossed to normal males still have reproductive defect, then the defect was traced to oocyte. (B) Evaluation of egg production from different crosses shown in A. Males were maintained by crossing equal number of males to hermaphrodites. Ad libido (AL) and CR conditions were achieved by plating  $1 \times 10^{11}$ /mL and  $1 \times 10^8$ /mL OP-50 bacteria, respectively, on solid nematode growth (NG) medium containing carbenicillin and kanamycin. CR or non-CR males and hermaphrodites ( $n > 20$ ) were crossed for 1 day and hermaphrodites were transferred to new plate to collect synchronized eggs. Egg production was evaluated in per worm per hour (egg/worm/h). Data were collected from 3 independent experiments. P values were obtained by t-test: ns, not significant; \*\*,  $P < 0.001$ . (C) The hatching rate of different crosses shown in A. CR and crosses were conducted as in B and synchronized eggs were collected from 20 mated hermaphrodites and counted. Eggs were allowed to hatch for 2-3 days and successful hatching was determined by survival worms. Data were collected from 3 independent experiments with each experiment examining  $n > 100$  eggs. P values were obtained by t-test: ns, not significant; \*\*,  $P < 0.001$ .

offspring growth. On the opposite, ad libido *C. elegans* produces and accumulates yolk proteins by converting its intestinal biomass to yolk proteins, favoring reproduction but interestingly causing multiple aging phenotypes [51]. Together, our study supports the “hyperfunction theory of aging” where continued

growth and increased reproduction can lead to aging and age-related pathologies [52].

How does methionine modulate gene expression such as those involved in yolk protein production? Maternal nutrition can modulate epigenetics in the fetal genome

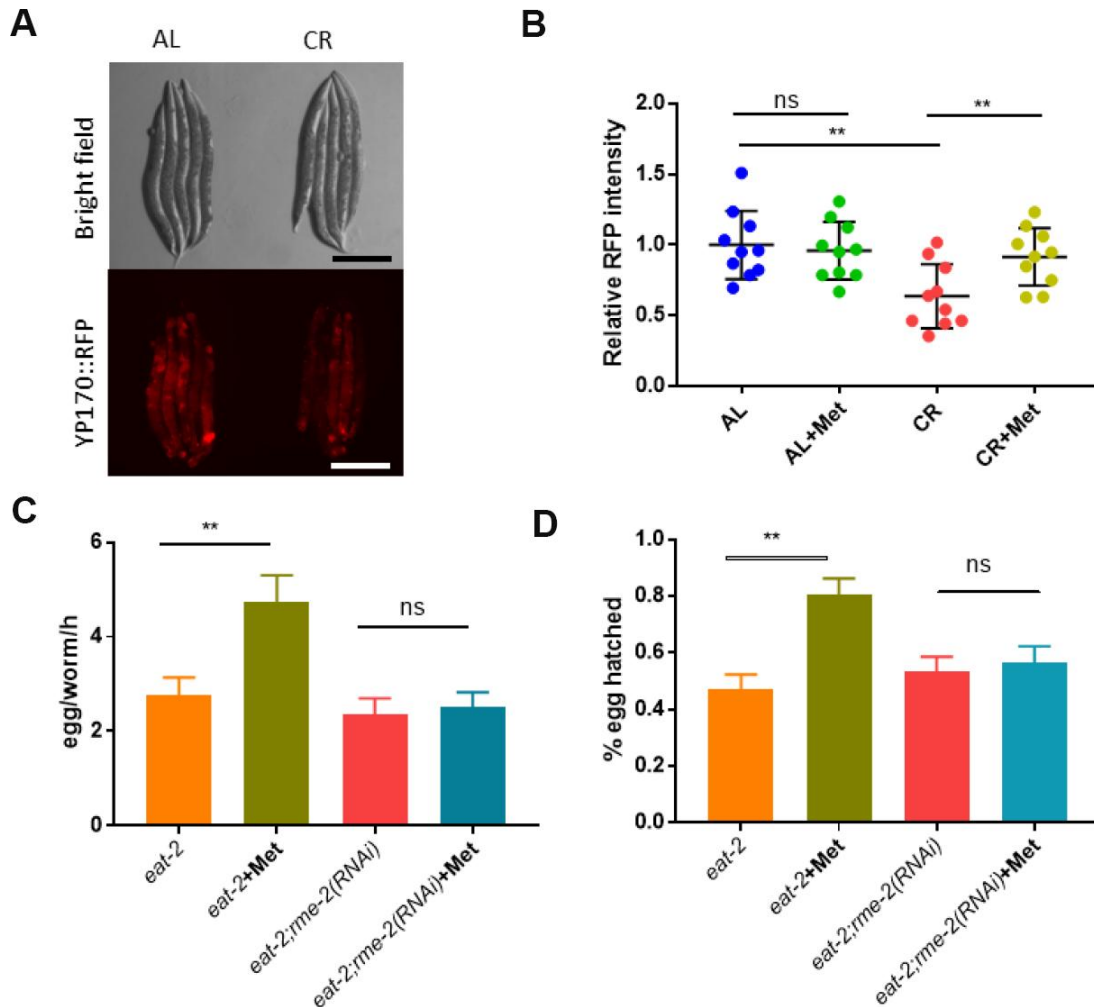

**Figure 5. The yolk proteins vitellogenin are required for methionine to mitigate the negative effect of CR on reproduction.**

(A) Calorie restriction reduced yolk protein production. Animals expressing tdimer2 -tagged vitellogenin YP170 were raised under ad libido (AL) and calorie restricted (CR) conditions as shown in Figure 1A and imaged by using Leica microscope. Representative images of 2 independent experiments were shown. (B) Methionine reversed the decreased YP170::tdimer2 expression caused by CR. Animals expressing tdimer2-tagged vitellogenin YP170 were raised under ad libido (AL) and calorie restricted (CR) conditions as shown in Figure 1A and imaged by using Leica microscope. 10 worms from 2 independent experiments were quantified by using ImageJ software and plotted by using Graphpad Prism software. P values were obtained by using student’s t-test: ns, not significant; \*\*, P<0.001. (C) Blocking oocyte uptake of yolk proteins vitellogenin prevents methionine’s beneficial effects on CR-compromised egg production. CR was achieved by using the *eat-2(ad1116)* mutant worms. N2 wild-type and *eat-2* mutant worms were raised on HT115 bacteria expressing vector only control (L4440) or *rme-2* double stranded interference RNA (RNAi) to knock down *rme-2* gene expression. Day-1 adult worms were examined for egg production by counting the total eggs within 3 hours. Data were collected from 3 independent experiment and plotted to show egg from per worm per hour (egg/worm/h). P values were obtained by t-test: ns, not significant; \*\*, P<0.001. (D) Blocking oocyte uptake of yolk proteins vitellogenin prevents methionine’s beneficial effects on CR-compromised embryo survival. CR and RNAi of N-2 wild-type and *eat-2* animals were conducted as in E and synchronized eggs (n>100) were obtained by allowing day-1 adult worms to lay eggs for 2 hours. Survival were measured by counting the dead and viable embryos. Data from 3 independent experiments were collect for analysis. P values were obtained by t-test: ns, not significant; \*\*, P<0.001.

through DNA methylation, resulting in permanent structural and physiological alternations in the offspring [1, 2, 53]. DNA methylation requires S-adenosylmethionine (SAM) as the major methyl group donor in the cell, which is derived largely from Met, in addition to betaine, choline, and 5-methyltetrahydrofolate (5-MTHF) [54, 55]. Since methionine is an essential methyl group donor for DNA methylation, the rescuing effect of methionine could be due to epigenetic changes favoring gene expression for embryonic maintenance. Indeed, transcriptional profiling of embryos from bovine preimplantation embryos shows that methionine suppress general gene expression [56], consistent with its role in DNA methylation. Methylation of DNA and selective gene transcription is likely very important for embryonic maintenance, as methionine metabolisms are elevated in embryonic stem cells from mouse and human and lacking methionine renders embryonic cells sensitive to apoptotic cell death [54]. Whether methionine's beneficial effect on reproduction under CR involves epigenetic regulation, however, await further investigations.

## MATERIALS AND METHODS

Please refer to Supplementary Information for additional and detailed protocols.

### Strains and medium

Transgenic vitellogenin reporter strain RT368 (pwIs98 [YP170::tdimer2 + unc-119(+)]) were published before [39], which were crossed to the control strain (N2 Bristol wild-type) 3 times. Standard nematode growth medium (NGM) were prepared according to Wormbook ([http://www.wormbook.org/chapters/www\\_strainmaintain/strainmaintain.html](http://www.wormbook.org/chapters/www_strainmaintain/strainmaintain.html)). Carbenicillin (50  $\mu$ M) and Kanamycin (50  $\mu$ M) were added to NG medium before pouring agar plates. Methionine were dissolved in water and added to NG medium before pouring agar plates. *C. elegans* strains were maintained at 20 °C on standard NGM plates seeded with OP-50 bacteria. For calorie restriction, OP-50 bacteria were cultured and diluted into 1X10<sup>11</sup>/ml and 1X10<sup>8</sup>/ml then plated on agar plate as shown in [35].

### RNAi treatment

RNAi experiments was conducted by feeding worms on agar plates with bacteria expressing double-stranded RNA (dsRNA) for *rme-2*. RNAi clones were originally from [57]. Specifically, RNAi bacteria were cultured to log phase and seeded on NG plates containing 50  $\mu$ g/mL Carbenicillin and 1 mM Isopropyl  $\beta$ -D-1-thiogalactopyranoside (IPTG) for at least 24 hours to

induce dsRNA expression. L1 stage worms were then transferred to and maintained on the RNAi plate for gene knockdown experiments.

### Egg production and survival assay

Worms were cultured on ad libido (AL) or calorie restricted (CR) medium from hatching to day-1 adulthood. AL and CR conditions were achieved by plating 1X10<sup>11</sup>/mL and 1X10<sup>8</sup>/mL OP-50 bacteria, respectively, on solid nematode growth (NG) medium containing carbenicillin and kanamycin. Worms were transferred to normal NG medium plates (5 worms/plate) for 3 hours to allow egg laying. Eggs were counted and divided by time and number of parental worms to obtain egg/worm/h. For embryo survival experiment, eggs collected above where allowed to hatch to L1/L2 worms. The numbers of larvae and dead eggs were counted. Experiments were repeated in 3 different days and data were collected for analysis by GraphPad Prism software.

### Quantification of worm length and fluorescence

Synchronized eggs from AL and CR parental hermaphrodites were collected and allowed to hatch and develop to day-1 adulthood. Worms were picked randomly and imaged with Leica stereomicroscope equipped with fluorescence channel. To quantify the length of worms, ImageJ software were used to draw lines in the middle of the worms from head to tail and measure to distance. For fluorescence intensity, ImageJ software were used to measure the area and the fluorescent signals of individual worms. The fluorescent intensity of individual worms was obtained by dividing the signals by worm area. Data were obtained from 10-20 animals and relative intensity were plotted with GraphPad Prism software by normalizing to the average value of controls.

### Lifespan assay

For lifespan assay in *C. elegans*, gravid worms were allowed to lay synchronized eggs on AL and CR plate supplemented with or without 5mM methionine for 2 hours (5 worms per plate). Eggs were allowed to hatch at 20°C young adulthood and worms were transferred to new plates every day to keep contamination by progenies. Lifespan were started from day-8 of adulthood by counting the survival and dead worms every other day. Worms with explosion, bagging and protruding vulva were censored. Death was defined by lack of any visible movement for 5 seconds after touching the tail. Lifespan data were also shown in Supplemental Information (SI). Lifespan assays were performed at different time for 3 times and pooled



together to be plotted and analyzed with GraphPad Prism software.

### Mating experiment

Mating was conducted by raising 5 males and 5 hermaphrodites at young adult stages on NG agar medium plate with a tiny spot of OP-50 bacteria (mating plate). To obtain age-matched CR males and hermaphrodites, hermaphrodites mated for 1 day were transferred to CR and AL plates to lay synchronized eggs for 2 hours. Eggs were allowed to hatch and develop to L4 larvae. Age-matched males and hermaphrodite were picked for mating on mating plate according to the combinations shown in Figure 4A.

### CONFLICTS OF INTEREST

The authors declare no conflicts of interest.

### FUNDING

This work was supported by National Natural Science Foundation of China (NSFC 31971093). Some strains were provided by the CGC, which is funded by NIH Office of Research Infrastructure Programs (P40 OD010440).

### REFERENCES

1. Peñagaricano F, Wang X, Rosa GJ, Radunz AE, Khatib H. Maternal nutrition induces gene expression changes in fetal muscle and adipose tissues in sheep. *BMC Genomics*. 2014; 15:1034. <https://doi.org/10.1186/1471-2164-15-1034> PMID:25429728
2. Wu G, Bazer FW, Cudd TA, Meininger CJ, Spencer TE. Maternal nutrition and fetal development. *J Nutr*. 2004; 134:2169–72. <https://doi.org/10.1093/jn/134.9.2169> PMID:15333699
3. Wei Y, Zhang YJ, Cai Y. Growth or longevity: the TOR's decision on lifespan regulation. *Biogerontology*. 2013; 14:353–63. <https://doi.org/10.1007/s10522-013-9435-6> PMID:23740528
4. Mattison JA, Roth GS, Beasley TM, Tilmont EM, Handy AM, Herbert RL, Longo DL, Allison DB, Young JE, Bryant M, Barnard D, Ward WF, Qi W, et al. Impact of caloric restriction on health and survival in rhesus monkeys from the NIA study. *Nature*. 2012; 489:318–21. <https://doi.org/10.1038/nature11432> PMID:22932268
5. Colman RJ, Anderson RM, Johnson SC, Kastman EK, Kosmatka KJ, Beasley TM, Allison DB, Cruzen C, Simmons HA, Kemnitz JW, Weindruch R. Caloric restriction delays disease onset and mortality in rhesus monkeys. *Science*. 2009; 325:201–04. <https://doi.org/10.1126/science.1173635> PMID:19590001
6. Colman RJ, Beasley TM, Allison DB, Weindruch R. Attenuation of sarcopenia by dietary restriction in rhesus monkeys. *J Gerontol A Biol Sci Med Sci*. 2008; 63:556–59. <https://doi.org/10.1093/gerona/63.6.556> PMID:18559628
7. Kastman EK, Willette AA, Coe CL, Bendlin BB, Kosmatka KJ, McLaren DG, Xu G, Canu E, Field AS, Alexander AL, Voytko ML, Beasley TM, Colman RJ, et al. A calorie-restricted diet decreases brain iron accumulation and preserves motor performance in old rhesus monkeys. *J Neurosci*. 2010; 30:7940–47. <https://doi.org/10.1523/JNEUROSCI.0835-10.2010> PMID:20534842
8. Longo VD, Fontana L. Calorie restriction and cancer prevention: metabolic and molecular mechanisms. *Trends Pharmacol Sci*. 2010; 31:89–98. <https://doi.org/10.1016/j.tips.2009.11.004> PMID:20097433
9. Mirzaei H, Di Biase S, Longo VD. Dietary Interventions, Cardiovascular Aging, and Disease: Animal Models and Human Studies. *Circ Res*. 2016; 118:1612–25. <https://doi.org/10.1161/CIRCRESAHA.116.307473> PMID:27174953
10. Feinman RD, Pogozelski WK, Astrup A, Bernstein RK, Fine EJ, Westman EC, Accurso A, Frassetto L, Gower BA, McFarlane SI, Nielsen JV, Krarup T, Saslow L, et al. Dietary carbohydrate restriction as the first approach in diabetes management: critical review and evidence base. *Nutrition*. 2015; 31:1–13. <https://doi.org/10.1016/j.nut.2014.06.011> PMID:25287761
11. Witte AV, Fobker M, Gellner R, Knecht S, Flöel A. Caloric restriction improves memory in elderly humans. *Proc Natl Acad Sci USA*. 2009; 106:1255–60. <https://doi.org/10.1073/pnas.0808587106> PMID:19171901
12. Pani G. Neuroprotective effects of dietary restriction: evidence and mechanisms. *Semin Cell Dev Biol*. 2015; 40:106–14. <https://doi.org/10.1016/j.semcdb.2015.03.004> PMID:25773162
13. Boldrin L, Ross JA, Whitmore C, Doreste B, Beaver C, Eddaoudi A, Pearce DJ, Morgan JE. The effect of caloric restriction on mouse skeletal muscle is sex, strain and time-dependent. *Sci Rep*. 2017; 7:5160. <https://doi.org/10.1038/s41598-017-04896-y> PMID:28698572

14. Villareal DT, Fontana L, Das SK, Redman L, Smith SR, Saltzman E, Bales C, Rochon J, Pieper C, Huang M, Lewis M, Schwartz AV, and CALERIE Study Group. Effect of Two-Year Caloric Restriction on Bone Metabolism and Bone Mineral Density in Non-Obese Younger Adults: A Randomized Clinical Trial. *J Bone Miner Res.* 2016; 31:40–51.  
<https://doi.org/10.1002/jbmr.2701> PMID:26332798
15. Pahlavani MA. Influence of caloric restriction on aging immune system. *J Nutr Health Aging.* 2004; 8:38–47. PMID:14730366
16. Stein Z, Susser M. Fertility, fecundity, famine: food rations in the dutch famine 1944/5 have a causal relation to fertility, and probably to fecundity. *Hum Biol.* 1975; 47:131–54. PMID:1126699
17. Stein Z, Susser M. The Dutch famine, 1944-1945, and the reproductive process. I. Effects on six indices at birth. *Pediatr Res.* 1975; 9:70–76.  
<https://doi.org/10.1203/00006450-197502000-00003> PMID:1118193
18. Stein Z, Susser M. The Dutch famine, 1944-1945, and the reproductive process. II. Interrelations of caloric rations and six indices at birth. *Pediatr Res.* 1975; 9:76–83.  
<https://doi.org/10.1203/00006450-197502000-00004> PMID:1118194
19. Johnson JE, Johnson FB. Methionine restriction activates the retrograde response and confers both stress tolerance and lifespan extension to yeast, mouse and human cells. *PLoS One.* 2014; 9:e97729.  
<https://doi.org/10.1371/journal.pone.0097729> PMID:24830393
20. Ruckenstuhl C, Netzberger C, Entfellner I, Carmona-Gutierrez D, Kickenweiz T, Stekovic S, Gleixner C, Schmid C, Klug L, Sorgo AG, Eisenberg T, Büttner S, Mariño G, et al. Lifespan extension by methionine restriction requires autophagy-dependent vacuolar acidification. *PLoS Genet.* 2014; 10:e1004347.  
<https://doi.org/10.1371/journal.pgen.1004347> PMID:24785424
21. Wu Z, Song L, Liu SQ, Huang D. Independent and additive effects of glutamic acid and methionine on yeast longevity. *PLoS One.* 2013; 8:e79319.  
<https://doi.org/10.1371/journal.pone.0079319> PMID:24244480
22. Lee BC, Kaya A, Ma S, Kim G, Gerashchenko MV, Yim SH, Hu Z, Harshman LG, Gladyshev VN. Methionine restriction extends lifespan of *Drosophila melanogaster* under conditions of low amino-acid status. *Nat Commun.* 2014; 5:3592.  
<https://doi.org/10.1038/ncomms4592> PMID:24710037
23. Troen AM, French EE, Roberts JF, Selhub J, Ordovas JM, Parnell LD, Lai CQ. Lifespan modification by glucose and methionine in *Drosophila melanogaster* fed a chemically defined diet. *Age (Dordr).* 2007; 29:29–39.  
<https://doi.org/10.1007/s11357-006-9018-4> PMID:19424828
24. Cabreiro F, Au C, Leung KY, Vergara-Irigaray N, Cochemé HM, Noori T, Weinkove D, Schuster E, Greene ND, Gems D. Metformin retards aging in *C. elegans* by altering microbial folate and methionine metabolism. *Cell.* 2013; 153:228–39.  
<https://doi.org/10.1016/j.cell.2013.02.035> PMID:23540700
25. Miller RA, Buehner G, Chang Y, Harper JM, Sigler R, Smith-Wheelock M. Methionine-deficient diet extends mouse lifespan, slows immune and lens aging, alters glucose, T4, IGF-I and insulin levels, and increases hepatocyte MIF levels and stress resistance. *Aging Cell.* 2005; 4:119–25.  
<https://doi.org/10.1111/j.1474-9726.2005.00152.x> PMID:15924568
26. Orentreich N, Matias JR, DeFelice A, Zimmerman JA. Low methionine ingestion by rats extends life span. *J Nutr.* 1993; 123:269–74.  
<https://doi.org/10.1093/jn/123.2.269> PMID:8429371
27. Bárcena C, Quirós PM, Durand S, Mayoral P, Rodríguez F, Caravia XM, Mariño G, Garabaya C, Fernández-García MT, Kroemer G, Freije JM, López-Otín C. Methionine Restriction Extends Lifespan in Progeroid Mice and Alters Lipid and Bile Acid Metabolism. *Cell Rep.* 2018; 24:2392–403.  
<https://doi.org/10.1016/j.celrep.2018.07.089> PMID:30157432
28. Orgeron ML, Stone KP, Wanders D, Cortez CC, Van NT, Gettys TW. The impact of dietary methionine restriction on biomarkers of metabolic health. *Prog Mol Biol Transl Sci.* 2014; 121:351–76.  
<https://doi.org/10.1016/B978-0-12-800101-1.00011-9> PMID:24373243
29. Hine C, Mitchell JR. Calorie restriction and methionine restriction in control of endogenous hydrogen sulfide production by the transsulfuration pathway. *Exp Gerontol.* 2015; 68:26–32.  
<https://doi.org/10.1016/j.exger.2014.12.010> PMID:25523462
30. Latimer MN, Freij KW, Cleveland BM, Biga PR. Physiological and Molecular Mechanisms of Methionine Restriction. *Front Endocrinol (Lausanne).* 2018; 9:217.  
<https://doi.org/10.3389/fendo.2018.00217> PMID:29780356

31. Grandison RC, Piper MD, Partridge L. Amino-acid imbalance explains extension of lifespan by dietary restriction in *Drosophila*. *Nature*. 2009; 462:1061–64. <https://doi.org/10.1038/nature08619> PMID:[19956092](https://pubmed.ncbi.nlm.nih.gov/19956092/)
32. Shafer DJ, Carey JB, Prochaska JF. Effect of dietary methionine intake on egg component yield and composition. *Poult Sci*. 1996; 75:1080–85. <https://doi.org/10.3382/ps.0751080> PMID:[8878263](https://pubmed.ncbi.nlm.nih.gov/8878263/)
33. Patton RA. Effect of rumen-protected methionine on feed intake, milk production, true milk protein concentration, and true milk protein yield, and the factors that influence these effects: a meta-analysis. *J Dairy Sci*. 2010; 93:2105–18. <https://doi.org/10.3168/jds.2009-2693> PMID:[20412926](https://pubmed.ncbi.nlm.nih.gov/20412926/)
34. Moatt JP, Nakagawa S, Lagisz M, Walling CA. The effect of dietary restriction on reproduction: a meta-analytic perspective. *BMC Evol Biol*. 2016; 16:199. <https://doi.org/10.1186/s12862-016-0768-z> PMID:[27717308](https://pubmed.ncbi.nlm.nih.gov/27717308/)
35. Ching TT, Hsu AL. Solid plate-based dietary restriction in *Caenorhabditis elegans*. *J Vis Exp*. 2011. <https://doi.org/10.3791/2701> PMID:[21654629](https://pubmed.ncbi.nlm.nih.gov/21654629/)
36. Lakowski B, Hekimi S. The genetics of caloric restriction in *Caenorhabditis elegans*. *Proc Natl Acad Sci USA*. 1998; 95:13091–96. <https://doi.org/10.1073/pnas.95.22.13091> PMID:[9789046](https://pubmed.ncbi.nlm.nih.gov/9789046/)
37. Morran LT, Cappy BJ, Anderson JL, Phillips PC. Sexual partners for the stressed: facultative outcrossing in the self-fertilizing nematode *Caenorhabditis elegans*. *Evolution*. 2009; 63:1473–82. <https://doi.org/10.1111/j.1558-5646.2009.00652.x> PMID:[19210536](https://pubmed.ncbi.nlm.nih.gov/19210536/)
38. Spieth J, Blumenthal T. The *Caenorhabditis elegans* vitellogenin gene family includes a gene encoding a distantly related protein. *Mol Cell Biol*. 1985; 5:2495–501. <https://doi.org/10.1128/MCB.5.10.2495> PMID:[3841791](https://pubmed.ncbi.nlm.nih.gov/3841791/)
39. Sato M, Sato K, Liou W, Pant S, Harada A, Grant BD. Regulation of endocytic recycling by *C. elegans* Rab35 and its regulator RME-4, a coated-pit protein. *EMBO J*. 2008; 27:1183–96. <https://doi.org/10.1038/emboj.2008.54> PMID:[18354496](https://pubmed.ncbi.nlm.nih.gov/18354496/)
40. Grant B, Hirsh D. Receptor-mediated endocytosis in the *Caenorhabditis elegans* oocyte. *Mol Biol Cell*. 1999; 10:4311–26. <https://doi.org/10.1091/mbc.10.12.4311> PMID:[10588660](https://pubmed.ncbi.nlm.nih.gov/10588660/)
41. Honjoh S, Ihara A, Kajiwaraya Y, Yamamoto T, Nishida E. The Sexual Dimorphism of Dietary Restriction Responsiveness in *Caenorhabditis elegans*. *Cell Rep*. 2017; 21:3646–52. <https://doi.org/10.1016/j.celrep.2017.11.108> PMID:[29281814](https://pubmed.ncbi.nlm.nih.gov/29281814/)
42. Liggett MR, Hoy MJ, Mastroianni M, Mondoux MA. High-glucose diets have sex-specific effects on aging in *C. elegans*: toxic to hermaphrodites but beneficial to males. *Aging (Albany NY)*. 2015; 7:383–88. <https://doi.org/10.18632/aging.100759> PMID:[26143626](https://pubmed.ncbi.nlm.nih.gov/26143626/)
43. Zajitschek F, Georgolopoulos G, Vourlou A, Ericsson M, Zajitschek SR, Friberg U, Maklakov AA. Evolution Under Dietary Restriction Decouples Survival From Fecundity in *Drosophila melanogaster* Females. *J Gerontol A Biol Sci Med Sci*. 2019; 74:1542–48. <https://doi.org/10.1093/gerona/gly070> PMID:[29718269](https://pubmed.ncbi.nlm.nih.gov/29718269/)
44. Jolly CA. Dietary restriction and immune function. *J Nutr*. 2004; 134:1853–56. <https://doi.org/10.1093/jn/134.8.1853> PMID:[15284365](https://pubmed.ncbi.nlm.nih.gov/15284365/)
45. Jolly CA. Is dietary restriction beneficial for human health, such as for immune function? *Curr Opin Lipidol*. 2007; 18:53–57. <https://doi.org/10.1097/MOL.0b013e3280115416> PMID:[17218833](https://pubmed.ncbi.nlm.nih.gov/17218833/)
46. Devlin MJ, Cloutier AM, Thomas NA, Panus DA, Lotinun S, Pinz I, Baron R, Rosen CJ, Bouxsein ML. Caloric restriction leads to high marrow adiposity and low bone mass in growing mice. *J Bone Miner Res*. 2010; 25:2078–88. <https://doi.org/10.1002/jbmr.82> PMID:[20229598](https://pubmed.ncbi.nlm.nih.gov/20229598/)
47. Greer EL, Maures TJ, Ucar D, Hauswirth AG, Mancini E, Lim JP, Benayoun BA, Shi Y, Brunet A. Transgenerational epigenetic inheritance of longevity in *Caenorhabditis elegans*. *Nature*. 2011; 479:365–71. <https://doi.org/10.1038/nature10572> PMID:[22012258](https://pubmed.ncbi.nlm.nih.gov/22012258/)
48. Berger SL. Transgenerational inheritance of longevity: epigenetic mysteries abound. *Cell Metab*. 2012; 15:6–7. <https://doi.org/10.1016/j.cmet.2011.12.012> PMID:[22225870](https://pubmed.ncbi.nlm.nih.gov/22225870/)
49. Zhang N. Role of methionine on epigenetic modification of DNA methylation and gene expression in animals. *Anim Nutr*. 2018; 4:11–16. <https://doi.org/10.1016/j.aninu.2017.08.009> PMID:[30167479](https://pubmed.ncbi.nlm.nih.gov/30167479/)
50. Levine RL, Moskowitz J, Stadtman ER. Oxidation of methionine in proteins: roles in antioxidant defense and cellular regulation. *IUBMB Life*. 2000; 50:301–07.

- <https://doi.org/10.1080/15216540051081056>  
PMID:11327324
51. Ezcurra M, Benedetto A, Sornda T, Gilliat AF, Au C, Zhang Q, van Schelt S, Petrache AL, Wang H, de la Guardia Y, Bar-Nun S, Tyler E, Wakelam MJ, Gems D. C. elegans Eats Its Own Intestine to Make Yolk Leading to Multiple Senescent Pathologies. *Curr Biol*. 2018; 28:2544–2556.e5.  
<https://doi.org/10.1016/j.cub.2018.06.035>  
PMID:30100339
52. Gems D, de la Guardia Y. Alternative Perspectives on Aging in *Caenorhabditis elegans*: Reactive Oxygen Species or Hyperfunction? *Antioxid Redox Signal*. 2013; 19:321–29.  
<https://doi.org/10.1089/ars.2012.4840>  
PMID:22870907
53. Burdge GC, Lillycrop KA. Nutrition, epigenetics, and developmental plasticity: implications for understanding human disease. *Annu Rev Nutr*. 2010; 30:315–39.  
<https://doi.org/10.1146/annurev.nutr.012809.104751>  
PMID:20415585
54. Shiraki N, Shiraki Y, Tsuyama T, Obata F, Miura M, Nagae G, Aburatani H, Kume K, Endo F, Kume S. Methionine metabolism regulates maintenance and differentiation of human pluripotent stem cells. *Cell Metab*. 2014; 19:780–94.  
<https://doi.org/10.1016/j.cmet.2014.03.017>  
PMID:24746804
55. Knowles L, Morris AA, Walter JH. Treatment with Mefolinate (5-Methyltetrahydrofolate), but Not Folic Acid or Folinic Acid, Leads to Measurable 5-Methyltetrahydrofolate in Cerebrospinal Fluid in Methylene tetrahydrofolate Reductase Deficiency. *JIMD Rep*. 2016; 29:103–07.  
[https://doi.org/10.1007/8904\\_2016\\_529](https://doi.org/10.1007/8904_2016_529)  
PMID:26898294
56. Peñagaricano F, Souza AH, Carvalho PD, Driver AM, Gamba R, Kropp J, Hackbart KS, Luchini D, Shaver RD, Wiltbank MC, Khatib H. Effect of maternal methionine supplementation on the transcriptome of bovine preimplantation embryos. *PLoS One*. 2013; 8:e72302.  
<https://doi.org/10.1371/journal.pone.0072302>  
PMID:23991086
57. Kamath RS, Fraser AG, Dong Y, Poulin G, Durbin R, Gotta M, Kanapin A, Le Bot N, Moreno S, Sohrmann M, Welchman DP, Zipperlen P, Ahringer J. Systematic functional analysis of the *Caenorhabditis elegans* genome using RNAi. *Nature*. 2003; 421:231–37.  
<https://doi.org/10.1038/nature01278> PMID:12529635

## SUPPLEMENTARY MATERIALS

### Supplementary Methods

#### NG Medium

- (1) 1M Potassium Phosphate buffer, pH 6.0: Dissolve in 1L distilled water 108.3 g  $\text{KH}_2\text{PO}_4$ , 35.6 g  $\text{K}_2\text{HPO}_4\text{-H}_2\text{O}$ , autoclave at 121 °C for 20 min.
- (2) Make 1 M  $\text{MgSO}_4$ , 1 M  $\text{CaCl}_2$  stock solution by dissolving in distilled water and autoclaving at 121 °C for 20 min.
- (3) Prepare 5 mg/mL Cholesterol in 98% ethanol, filtered through 2.2  $\mu\text{m}$  solvent compatible PVDF syringe filter.
- (4) Prepare 100mg/mL carbenicillin and 50mg/mL kanamycin stock solution in water, filtered through 2.2  $\mu\text{m}$  syringe filter.
- (5) Nematode Growth Media (NGM), 1L: dissolve 3 g NaCl, 2.5 g Bacto-Peptone and 20g Agar to distilled water, autoclave at 121 °C for 20 min. When cool down to around 60 °C, add 1mL  $\text{MgSO}_4$ (1 M), 1mL  $\text{CaCl}_2$ (1 M), 1mL Cholesterol (5 mg/mL), 25mL Potassium Phosphate buffer (1M). Mix thoroughly. Pipette 4 mL to 60mm culture dish.
- (6) To make RNAi plate, 1mL carbenicillin (100mg/mL) and 1 mM Isopropyl  $\beta$ -D-1-thiogalactopyranoside (IPTG) were also added before pouring the medium to the plate in step (5).
- (7) To make CR/DR plate, 1mL carbenicillin (100mg/mL) and 1mL kanamycin (50mg/mL) were added before pouring the medium to the plate in step (5).

#### Amino acid supplementation

- (1) According to sigma product specification, the solubility of L-Cysteine hydrochloride monohydrate (C7880) in  $\text{H}_2\text{O}$  is up to 50 mg/ml (284.69mM). To make 200mM stock solution, dissolve 1.76 g L-Cysteine hydrochloride monohydrate in ddH<sub>2</sub>O and autoclave at 121 °C for 20 min.
- (2) According to sigma product specification, the solubility of n-acetyl-Cysteine in water is up to 100mg/ml (612.78mM). To make NAC stock solution of 200mM, 1.63 g NAC powder (Sigma Catalog No. A7250) was dissolved in 50 mL

ddH<sub>2</sub>O with stirring and heating until clear then autoclaved at 121 °C for 20 min

- (3) According to sigma product specification, the solubility of L-Threonine in water is up to 50 mg/ml (419.74mM). To make NAC stock solution of 200mM, 1.19 g L-Threonine powder (Sigma Catalog No. T8625) was dissolved in 50 mL ddH<sub>2</sub>O with stirring and heating until clear then autoclaved at 121 °C for 20 min
- (4) As L-Leucine has limited solubility in water, we use 100mM L-Leucine hydrochloride solution from Sigma (Sigma Catalog No.80687).
- (5) NG medium were prepared, autoclaved and cooled down to around 60 °C, then amino acid solutions were added to make final concentrations of 1mM, 2mM, 5mM, 10mM. The stock solution was used within 3 month and the plates were used within 1 month.

#### Seeding bacteria

- (1) OP-50 bacteria were maintained on LB broth. Single colony was picked and cultured in 10 mL LB broth by shaking at 37°C incubator overnight.
- (2) To obtain a standard curve for the relationship between OD600 and the concentration of bacteria (cfu/ml), bacteria were diluted 2x, 4x, 8x, 16x, 32x and the OD600 were determined. Bacteria at each dilution were further diluted 1X10<sup>6</sup> times (1000-fold dilution twice) and 0.1 ml were plated on a LB agar plate. After overnight incubation at 37°C, count the number of bacterial colonies and convert the concentration to (number of bacteria/ml), which is the same as cfu/ml. The relationship between measured OD600 values and OP50 bacteria concentrations can be established by plotting OD600 as a function of bacterial concentration (cfu/mL). Linear regression was obtained by using Excel software.
- (3) To prepare control and CR/DR medium plate, the OD600 values of fresh OP-50 culture corresponding to 1x10<sup>11</sup>/ml (control) and 1X10<sup>8</sup>/ml (CR/DR) were determined from standard curve in previous step. 0.2ml of bacteria were added to the center of 60mm NGM plate containing 100mg/mL carbenicillin and 50mg/mL kanamycin to prevent bacteria from growing. Place plates in 37 °C incubator to dry the bacteria culture. Plate can be stored at 4°C for at least 1 months.

#### RNAi treatment

- (1) RNAi agar plates were prepared as show in in above, “NG medium, step (6)”.

- (2) RNAi bacteria. RNAi clones and vector only control were picked from a bacterial library and cultured in LB liquid medium supplemented with 50mg/ml carbenicillin at 37 °C with vigorous shaking overnight. Dilute RNAi bacteria culture to OD600 ~ 0.2 and continue to culture at the same condition for ~ 2 hours until the OD600 ~ 0.5.
- (3) Add RNAi bacteria to RNAi agar plate shown in (1) in the middle of the plate, avoid touching the surface of agar medium. Let it dry at room temperature (~25°C) for at least 24 hours to induce dsRNA expression. Plates can be stored at 4 °C for at least 1 month. Always use the same batch for control and treated groups.
- (4) Preparing synchronized worms. Worms were maintained at 20 °C on NG agar medium by transferring about 10 asynchronized larvae worms to fresh plate every 3~4 days. To obtain age synchronized L1 animals, gravid worms were transferred to RNAi bacteria plate (5 worms/plate) for 3 hours to allow egg laying. Then gravid worms were removed from the plates.
- (5) Transfer worms to new plate. Eggs on RNAi plates were maintained at 20 °C for about 3 days where animals reach adult stage. Transfer animals to new plate every 2 days until animals a longer lay eggs.

### **Egg production and hatching assay**

- (1) CR/DR treatment. CR/DR plates were prepared as show in “NG medium, step (6)”. Worms were normally maintained at 20 °C on NG agar medium by transferring about 10 asynchronized larvae worms to fresh plate every 3~4 days to avoid starvation. To CR/DR the animals, gravid worms were transferred to control (ad libido or AL) or CR/DR plate (5 worms/plate) for 3 hours to allow egg laying. Then gravid worms were removed from the plates.
- (2) Synchronizing eggs. Worms were cultured on ad libido (AL) or calorie restricted (CR) medium from hatching to day-1 adulthood. Gravid worms from both AL and CR conditions were transferred to ad libido (AL) NG medium plates (5 worms/plate) for 3 hours to allow egg laying. Since parental worms at CR conditions grow slower, to do the egg production assay at the same time, do step (1) for several days in a row to make sure the gravid worms are available for both CR and AL condition. Eggs were counted after 3 hours and divided by time and number of parental worms to obtain egg/worm/h. Experiments were repeated 3 times and data were collected for analysis by GraphPad Prism software.

- (3) For embryo survival experiment, eggs collected above where allowed to hatch overnight. The numbers of larvae and dead eggs were counted. Experiments were repeated in 3 different days and data were collected for analysis by GraphPad Prism software.

### **Quantification of worm length and fluorescence by ImageJ**

- (1) Synchronized eggs from AL and CR. Parental worms were cultured on ad libido (AL) medium plate until adulthood. Gravid worms were transferred to control (ad libido or AL) or CR/DR plate (5 worms/plate) for 3 hours to obtain synchronized eggs. Then gravid worms were removed from the plates. Since worms at CR conditions grow slower, to obtain age-similar young adult worms, do egg synchronization for several days in a row to make sure the young adults are available for both CR and AL condition.
- (2) Synchronized eggs from step (1) were allowed to grow at 20 °C until adulthood. Day-1 adult animals were picked randomly and imaged with Leica stereomicroscope equipped with fluorescence channel. Experiments were repeated biologically at least for 3 times at different dates.
- (3) ImageJ software were used to quantify the length of the animals. Draw lines in the middle of the worms from head to tail and measure to distance, which is indication of the length of the animals. Do the same for ~ 20 animals from different image panel for each condition and plot the relative length of worms with GraphPad Prism software by normalizing to the average length of control animals.
- (4) For fluorescence intensity, synchronized eggs were obtained and animals raised as in step (1) and (2). ImageJ software were used to measure the area and the fluorescent signals of individual worms. The fluorescent intensity of individual worms was obtained by dividing the signals by worm area. Data were obtained from 10-20 animals and relative intensity were plotted with GraphPad Prism software by normalizing to the average value of controls

### **Lifespan assay of adult animals**

- (1) NG medium plates of CR and AL, with and without Methionine were prepared as shown in “NG medium, step (6) and (7)”.
- (2) To prepare age-synchronized worms, gravid worms from AL plate were allowed to lay eggs on AL and

CR plate supplemented with or without 5mM methionine for 2 hours (5 worms per plate).

- (3) To maintain adult worms, eggs were incubated at 20 °C incubator until adulthood. Adult worms were transferred to new plate to avoid overcrowded by larvae. Keep transfer animals every other day until no eggs were produced.
  - (4) For lifespan assay in *C. elegans*, lifespan was started from day-8 of adulthood by counting the survival and dead worms every other day. Worms with explosion, bagging and protruding vulva were censored. Death was defined by lack of any visible movement for 5 seconds after touching the tail. Lifespan data were also shown in Supplementary Information (SI) Supplementary Tables 1 and 2. Lifespan assays were performed at different time for 3 times and pooled together to be plotted and analyzed with GraphPad Prism software.
- (2) Keeping male population. Maintain male populations by picking 5 males and 5 hermaphrodites to mating plates. The mating plates are generated by transferring a tiny bit of OP-50 bacteria on the middle of empty NGM medium plates.
  - (3) Obtaining age-matched males and hermaphrodites from AL and CR condition. Pick gravid hermaphrodites from mating plates in (2) to AL and CR plates (5 worms/plate, 5 plates). Allow egg laying for 2 hours. Remove hermaphrodites from plates. Incubate at 20 °C for ~3 days. Identify and separate L4 males and hermaphrodite from AL and CR conditions to new plates.
  - (4) Mating of CR and AL animals. Pick L4 males and hermaphrodites from AL and CR conditions on mating plate as shown in (2), according to the combinations shown in (2) Figure 4A. Animals were allowed to mate overnight.
  - (5) Egg production and hatching assay of mated animals. Mated hermaphrodites were transferred to normal NGM plates for 2 hours to collect synchronized eggs. Egg production and hatching rate were conducted as shown in “Egg production and hatching assay step (2)-(3)”.

### **Mating assay**

- (1) Obtaining males. *C. elegans* males presents in the AL condition less than 0.5%. To obtain males, L4 hermaphrodite were picked to AL NG plate (4 worms/plate, 5 plates) and incubated at 30 °C for 5 hours. Heat-shocked animals were transferred back to 20 °C incubator for ~3 days. Males were identified and picked to new NGM plates.

## Supplementary Figures

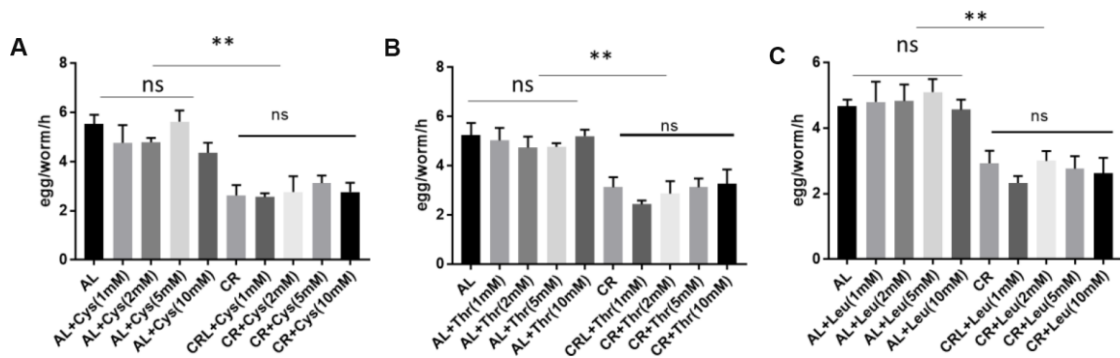

**Supplementary Figure 1. Amino acids cysteine (A), threonine (B) and Leucine (C) did not improve the impaired egg production caused by calorie restriction (CR).** Ad libido (AL) and CR conditions were achieved by plating 1X1011/mL and 1X108/mL OP-50 bacteria, respectively, on solid nematode growth (NG) medium containing carbenicillin and kanamycin. Worms were raised on NG medium supplemented with indicated concentrations of cysteine (Cys), threonine (Thr) and leucine (Leu) from hatching to day-1 adulthood. Worms ( $n > 25$ ) were allowed to lay eggs for 3 hours and egg production were evaluated in per worm per hour (egg/worm/h). Data were collected from 3 independent experiments. P values were obtained by t-test: ns, not significant; \*\*,  $P < 0.001$ .



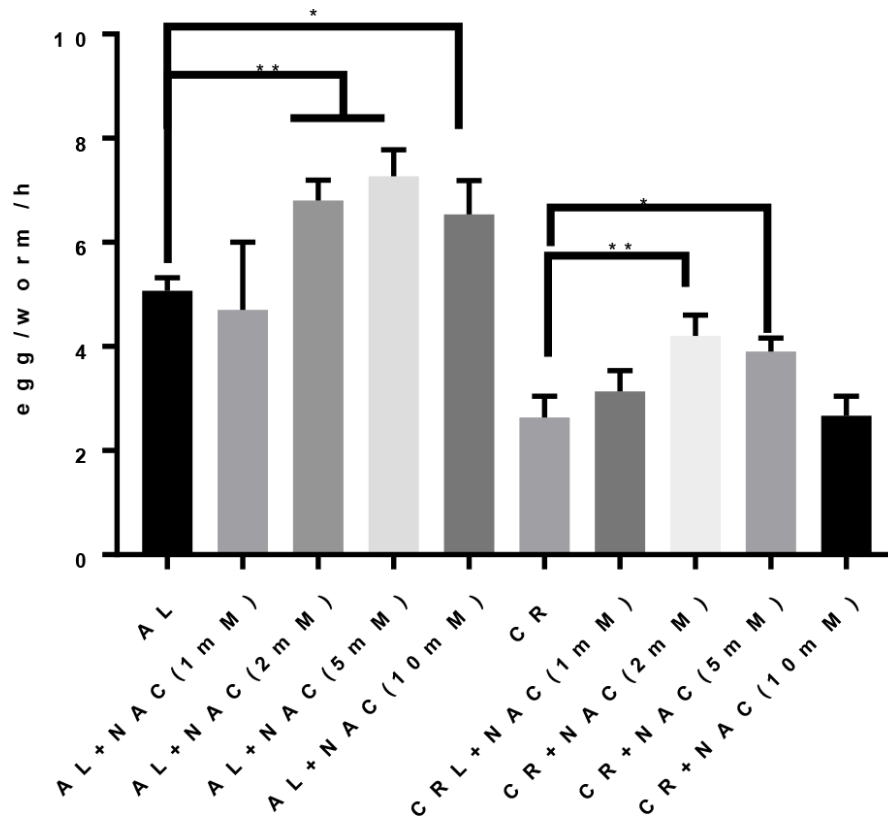

**Supplementary Figure 2. The cysteine precursor n-acetyl-cysteine (NAC) enhance egg production in both control and calorie-restricted *C. elegans*.** Ad libido (AL) and CR conditions were achieved by plating 1X10<sup>11</sup>/mL and 1X10<sup>8</sup>/mL OP-50 bacteria, respectively, on solid nematode growth (NG) medium containing carbenicillin and kanamycin. Worms were raised on NG medium supplemented with indicated concentrations of NAC from hatching to day-1 adulthood. Worms (n>25) were allowed to lay eggs for 3 hours and egg production were evaluated in per worm per hour (egg/worm/h). Data were collected from 3 independent experiments. P values were obtained by t-test: \*, P<0.01; \*\*, P<0.001; otherwise, not significant.

## Supplementary Tables

Supplementary Table 1. Related to Figure 3A.

| Treatment     | Death | Censored | Median survival (day) | P value to Ctrl | P values to CR |
|---------------|-------|----------|-----------------------|-----------------|----------------|
| Ctrl          | 97    | 6        | 20                    | NA              | <0.0001        |
| Ctrl+Met(5mM) | 101   | 6        | 22                    | NS              | <0.0001        |
| CR            | 98    | 9        | 26                    | <0.0001         | NA             |
| CR+Met(5mM)   | 97    | 9        | 26                    | <0.0001         | NS             |

Supplementary Table 2. Related to Figure 3A.

| Treatment              | Death | Censored | Median survival (day) | P value to N2 | P values to <i>eat-2</i> |
|------------------------|-------|----------|-----------------------|---------------|--------------------------|
| N2                     | 100   | 13       | 22                    | NA            | <0.0001                  |
| N2+Met(5mM)            | 99    | 14       | 22                    | NS            | <0.001                   |
| <i>eat-2</i>           | 109   | 7        | 26                    | <0.0001       | NA                       |
| <i>eat-2</i> +Met(5mM) | 98    | 14       | 26                    | <0.0001       | NS                       |
